# Supplementary material for: Anti-Allergic Effect of Low Molecular Weight Digest from Abalone Viscera on Atopic Dermatitis-Induced NC/Nga
Source: MDPI journal article supplement (doi:10.3390/md19110634), 2021-11-12
Supplement: s1 [file s1]

## **Anti-allergic Effect of Low Molecular Weight Digest from Abalone Viscera on Atopic Dermatitis-Induced NC/Nga**

Tae-Hee Kim <sup>1,3,#</sup>, Seong-Yeong Heo <sup>2,3,#</sup>, Gun-Woo Oh <sup>2,3</sup>, Won Sun Park <sup>4</sup>, Il-Whan Choi <sup>5</sup>,

Zhong-Ji Qian <sup>6,7</sup> and Won-Kyo Jung <sup>1,2,3,\*</sup>

<sup>1</sup> Department of Biomedical Engineering and New-senior Healthcare Innovation Center (BK21 Plus), Pukyong National University, Busan 48513, Republic of Korea

<sup>2</sup> Research Center for Marine Integrated Bionics Technology, Pukyong National University, Busan 48513, Republic of Korea

<sup>3</sup> Marine integrated Biomedical Technology center, The National Key Research Institutes in Universities, Pukyong National University, Busan 48513, Republic of Korea

<sup>4</sup> Department of Physiology, Kangwon National University School of Medicine, Chuncheon, 24341, Republic of Korea

<sup>5</sup> Department of Microbiology, Inje University College of Medicine, Busan, 48516, Republic of Korea

<sup>7</sup> Southern Marine Science and Engineering Guangdong Laboratory, Zhanjiang 524-088, China

<sup>6</sup> School of Chemistry and Environmental Science, Guangdong Ocean University, College of Food Science and Technology, Zhanjiang 524-088,

\* Correspondence: wkjung@pknu.ac.kr (W.-K.J.); Tel.: Tel.: +82-51-629-5775

# These authors contributed equally to this study

## List of Figures

**Figure S1.** Body weights in each group of NC/Nga mice were monitored once/week for 3 weeks after the first application of Biostir-AD ointment. Values shows the mean  $\pm$  SD of 5 mice.

### Measure of body weights

Body weights of the NC/Nga mice were monitored once a week during the experimental period.

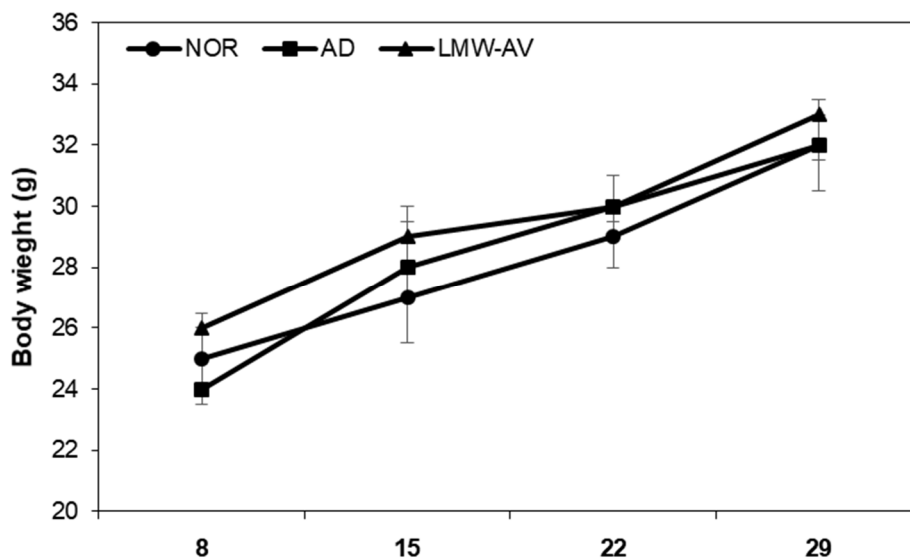

**Figure S1.** Body weights in each group of NC/Nga mice were monitored once/week for 3 weeks after the first application of Biostir-AD ointment. Values shows the mean  $\pm$  SD of 5 mice.
